1 Title: Fungal traits important for soil aggregation

2

3

4

5 Anika Lehmann <sup>a, b</sup>, Weishuang Zheng <sup>c</sup>, Masahiro Ryo <sup>a, b</sup>, Katharina Soutschek <sup>a</sup>, Rebecca

6 Rongstock <sup>a</sup>, Stefanie Maaß <sup>b, d</sup>, Matthias C. Rillig <sup>a, b</sup>

7

8 <sup>a</sup> Freie Universität Berlin, Institut für Biologie, Plant Ecology, Altensteinstr. 6, D- 14195 Berlin,

9 Germany

10 <sup>b</sup> Berlin-Brandenburg Institute of Advanced Biodiversity Research, D-14195 Berlin, Germany

11 <sup>c</sup> Shandong University, College of Marine Science, Weihuan West Road 180, C- 264209 Weihai,

12 China

13 <sup>d</sup> Universität Potsdam, Institut für Biologie und Biochemie, Plant Ecology and Nature

14 Conservation, Am Mühlenberg 3, D-14476 Potsdam, Germany

15

16 ***Author to whom correspondence should be sent***

17 Anika Lehmann, Freie Universität Berlin, Institut für Biologie, Altensteinstr. 6, D-14195 Berlin,

18 Germany; Tel +49 30 838 53145; lehmann.anika@googlemail.com

19

20

21

22 **Keywords:** soil aggregation; traits; saprobic fungi; random forest

23

24

25

## 26 Abstract

27

28 Soil health and sustainability is essential for ecosystem functioning and human well-being. Soil  
29 structure, the complex arrangement of soil into aggregates and pore spaces, is a key feature of  
30 soils under the influence of soil life. Soil biota, and among them filamentous saprobic fungi,  
31 have well-documented effects on soil aggregation. However, it is unclear what fungal properties,  
32 or traits, contribute to the overall positive effect on soil aggregation. So far, we lack a systematic  
33 investigation of a broad suite of fungal species for their trait expression and the relation of these  
34 traits to their soil aggregation capability.

35 Here, we apply a trait-based approach to a set of 15 traits measured under standardized  
36 conditions on 31 fungal strains including Ascomycota, Basidiomycota and Mucoromycota, all  
37 isolated from the same soil.

38 We found a spectrum of soil aggregate formation capability ranging from neutral to positive and  
39 large differences in trait expression among strains. We identified biomass density (positive  
40 effects), leucine aminopeptidase activity (negative effects) and phylogeny as important  
41 modulators of fungal aggregate formation capability. Our results point to a typical suite of traits  
42 characterizing fungi that are good soil aggregators; this could inform screening for fungi to be  
43 used in biotechnological applications, and illustrates the power of employing a trait-based  
44 approach to unravel biological mechanisms of soil aggregation, which could now be extended to  
45 other organism groups.

46

47

## 48 1. Introduction

49 Soil is our most vital resource, with soil and its biodiversity contributing to many ecosystem  
50 processes (Bardgett and van der Putten, 2014), and to human nutrition, health and wellbeing  
51 (Wall et al., 2015). Soil has been described as the most complex biomaterial on Earth (Young  
52 and Crawford, 2004) with soil structure as one of its most important features. Soil structure  
53 represents the three-dimensional arrangement of soil particles into aggregates and associated  
54 pore spaces and is also a crucial parameter for sustainable management of soils (Bronick and  
55 Lal, 2005); therefore, it is of great interest to unravel how soil biota contribute to the process of  
56 soil aggregation.

57  
58 Many soil biota influence soil aggregation (Lehmann et al., 2017b), and among them are the  
59 filamentous fungi. These fungi have a particularly well-documented impact on soil structure  
60 especially at the macroaggregate (>250 $\mu$ m) scale, as highlighted in a meta-analysis (Lehmann  
61 et al., 2017b). Soil aggregating capability of fungi is hypothesized to be due to a range of  
62 physical, morphological, chemical and biotic traits (Six et al., 2004; Bronick and Lal, 2005;  
63 Lehmann et al., 2017a). While foraging and growing through soil, fungi are thought to entangle  
64 and enmesh soil particles and aggregates due to their filamentous growth form (Tisdall and  
65 Oades, 1982). Fungi also exude extracellular biopolymers which can act as cements and  
66 surface sealants for soil aggregates (Chenu, 1989; Caesar-TonThat and Cochran, 2000;  
67 Daynes et al., 2012), and enzymes degrading organic matter (Baldrian et al., 2011), which may  
68 serve as aggregate-disintegrating agents. Among the molecules they release are also  
69 hydrophobins, which can modify wettability of aggregates, likely serving a stabilizing function  
70 (Zheng et al., 2016). While growing through soil, fungi also interact with other members of the  
71 soil community, for example they can be grazed upon by Collembola, which can also influence  
72 soil aggregation ability (e.g. (Siddiky et al., 2012a; Siddiky et al., 2012b)).

73  
74 Fungi likely differ in many of these traits, and thus also in their soil aggregation capability. In  
75 fact, exploring a global dataset of fungal contributions to soil aggregation, Lehmann et al.  
76 (Lehmann et al., 2017b) revealed a wide range in soil aggregation effectiveness for the 117  
77 species for which experimental data were available. However, in this analysis it remained  
78 unclear which fungal traits underpin the observed effects on soil aggregation, simply because  
79 the relevant trait data are unavailable.

80

81 What is needed are studies that systematically compare fungal traits in a set of species and that  
82 relate these to soil aggregate ability. So far, only a limited number of such studies are available  
83 (Table S1). These studies have mainly focused on fungal biomass and some chemical traits,  
84 using specific fungal groups, such as arbuscular or ectomycorrhizal fungi. Much less is known  
85 for soil saprobic fungi. In all these studies a limited set of fungi (typically in the range of 3 to 9  
86 species) was examined for their traits (no more than 3 traits). In cases where larger suites of  
87 fungi (up to 85 fungal strains/ mutants) were investigated for their soil aggregation ability no  
88 traits were measured (Table S1). This lack of data currently prevents us from arriving at more  
89 broadly generalizable conclusions.

90  
91 A way forward to address this issue is by applying a trait-based approach, especially for  
92 saprobic fungi (Lehmann and Rillig, 2015). As opposed to arbuscular mycorrhizal fungi, for  
93 which most work in this context has been done (Rillig et al., 2015), there are also clear traits for  
94 disaggregation ability in this group: aspects of enzymatic ability. In a trait-based approach, using  
95 a reasonably large suite of isolates, organismal traits can be related to specific functions. Such  
96 approaches generally convert species into points in 'trait-space', thus overcoming limitations  
97 associated with examining a few, idiosyncratically selected strains, and thus allowing for more  
98 generalizable inferences (Crowther et al., 2014; Aguilar-Trigueros et al., 2015).

99  
100 Here, we investigated a set of 31 filamentous fungal strains, all saprobic fungi isolated from the  
101 same soil and then compared under identical conditions in the laboratory. The 31 strains are  
102 distributed among the Ascomycota, Basidiomycota and Mucoromycota (Spatafora et al., 2016),  
103 and we screened each for the expression of a suite of 15 traits. With these data, we wished to  
104 determine (i) which morphological, chemical and biotic traits are most important for soil  
105 aggregation and (ii) what characterizes an efficient or poor soil aggregator.

106

## 107 2. Materials and Methods

### 108 2.1. *Soil and fungal strains*

109

110 Soil samples and fungal strains were obtained from Mallnow Lebus, a dry grassland in a natural  
111 reserve (Brandenburg, Germany, 52° 27.778' N, 14° 29.349' E) characterized by a sandy loam  
112 soil texture. The collected soil samples were either used for establishing fungal cultures or were

113 air-dried and stored until further use in experiments. The isolation of the 31 fungal strains was  
114 previously described in Andrade-Linares et al. (Andrade-Linares et al., 2016). Briefly, washed  
115 and diluted soil was used for the isolation procedure to minimize spore abundance and to  
116 increase the probability of capturing fungi derived from hyphae attached to soil particles (Gams  
117 and Domsch, 1967; Thorn et al., 1996). Afterwards soil suspensions were incubated on a  
118 variety of media with applications of different antibiotics suitable for cultivation of Ascomycota,  
119 Basidiomycota and Mucoromycota while suppressing bacterial growth. Isolates were grown on  
120 PDA at room temperature (22°C). Our final set of fungal strains comprised 20 Ascomycota, four  
121 Basidiomycota and seven Mucoromycota strains (Fig.1, Table S2). The corresponding  
122 phylogenetic tree was calculated following the procedure by Andrade-Linares et al. (2016).  
123 Briefly, ITS regions were sequenced using the primers ITS1F and ITS4. Sequences were  
124 matched in GenBank and aligned via Muscle v. 3.8.31 (Edgar, 2004). For reconstruction of  
125 phylogenetic relationships across the 31 fungal strains, a Bayesian maximum likelihood  
126 approach was applied using BEAST v. 1.7.2 (Drummond and Rambaut, 2007). A general time  
127 reversible substitution model was run with gamma-distributed substitution rates. Further a  
128 Bayesian chain with 20 million generations was implemented. The phylogenetic tree was rooted  
129 by the isolate *Chytridium olla* (GenBank accession number: FJ822974) which was used as an  
130 outgroup. Generated trees were sampled every 2000 generations from which the first 1000  
131 were discarded as the burn-in (see e.g. Nascimento et al., 2017). The summary tree represents  
132 the maximum clade credibility tree with median clade heights.

133

## 134 2.2. Soil aggregate formation

135

136 The soil aggregate formation assay used here aimed to test for *de novo* aggregate formation by  
137 fungi. This technique was modified from Tisdall et al. (2012). Here, we filled 6 cm petri dishes  
138 with a 5 mm layer of agar (1.5%, Panreac AppliChem, Darmstadt, Germany) to provide  
139 moisture, and this layer was covered with 10.0 g of soil. The soil was gently poured onto the  
140 agar to avoid any artificial compaction. Prior to this, the soil (from the field site from which the  
141 fungi were originally isolated) was sieved to a fraction < 1mm and autoclaved two times in a dry  
142 cycle. The soil was then allowed to equilibrate for two days on the agar before inoculation.  
143 During this time, the soil was rewetted by capillary action. This way, we provided a moist but not  
144 waterlogged environment for the fungal strains. The fungal strains used for inoculation were  
145 cultured on PDA and incubated with sterilized poppy (*Papaver somniferum*) seeds as carrier  
146 material. Colonized poppy seeds were transferred to soil - with two seeds per species added

147 per soil plate. For the controls, non-colonized poppy seeds incubated on PDA were transferred  
148 to the soil plates. Finally, plates were sealed and stored at room temperature (22°C, the  
149 culturing temperature of our fungal strains) in the dark for six weeks until harvest. The  
150 experiment consisted of ten replicates for 31 fungal strains and a control, resulting in 320  
151 experimental units.

152 We visually confirmed for every strain (on two replicates) that hyphae were not just growing on  
153 the surface of the soil, but that that mycelium was present inside the soil. At harvest, the plates  
154 were opened and dried at 60°C overnight. Subsequently, the soil was carefully extracted from  
155 the Petri dishes, passed through a 1 mm sieve to extract all aggregates larger than 1 mm, which  
156 were formed during the experiment. To do so, we vertically moved the sieve two times to allow  
157 separation while avoiding abrasion of soil aggregates. Additionally, we tapped against the sieve  
158 frame. By this, we increased the likelihood of passing aggregates and particles <1mm captured  
159 by hyphae through the mesh. The weight of the soil fraction >1mm was used for the calculation  
160 of the soil aggregate formation for our 31 fungal strains and the corresponding controls following  
161 the equation: % SAF = (aggregates <sub>>1mm</sub> / 10.0) \*100.

162 This approach offers the opportunity to test soil aggregate formation for an *a priori* size fraction  
163 (here 1mm). However, this design does not capture any dynamics for the <1mm soil fraction.  
164 Hence any impact of the 31 fungal strains on e.g. microaggregate formation could not be  
165 evaluated here.

166

### 167 2.3. Trait measurements

168

169 To build a trait database, we investigated 15 different traits capturing morphological, chemical  
170 and biotic features of our 31 fungal strains (Lehmann and Rillig, 2015; Lehmann et al., 2017a).  
171 The traits were chosen to characterize different aspects of the fungal mycelium and its products  
172 by which the fungus interacts with its environment. Additionally, the traits had to be measurable  
173 for all 31 strains, using methods that worked for all of them. The trait data were either obtained  
174 from dedicated new experiments or collected from previously published studies (Lehmann et al.,  
175 2018; Zheng et al., 2018) using the set of 31 fungal strains; data origin is given in the text.  
176 With the exception of hyphal length, all traits were measured under standardized in vitro  
177 conditions which were suitable for all our fungal strains. It was not feasible to realize trait  
178 measurements in soil since it is an opaque and highly heterogeneous substrate. Instead we  
179 used potato dextrose agar, a widely used standard growth medium for fungi. By this, we ensure

180 a consistent environmental setting for trait measurements (Aguilar-Trigueros et al., 2015;  
181 Lehmann and Rillig, 2015).

182 *Morphological traits.* We measured hyphal length in soil (in m g<sup>-1</sup> soil); for this we used soil  
183 samples from the soil aggregate formation assay; hence we had ten replicates for each fungal  
184 strain and the control. For extracting hyphae and measuring hyphal length, 4.0 g of the  
185 experimental soil were used, and hyphae counted at 200x magnification (Tennant, 1975;  
186 Jakobsen et al., 1992). The hyphal length found in the controls was set as the background; that  
187 is, dead hyphae that were present in the soil after autoclaving.

188 In order to measure colony radial growth rate (in  $\mu\text{m h}^{-1}$ ), the 31 fungal strains were cultivated  
189 on full strength PDA - a rich medium generally preventing growth limitations in our fungal  
190 strains. For each fungal strain five replicates were used. For the set-up, a pre-sterilized poppy  
191 seed colonized by a fungal strain was placed in the center of a PDA plate which was then  
192 incubated for four weeks in the dark at room temperature (22°C). At day 0, 3, 5, 7, 14, 21 and  
193 28, all plates were scanned from the back with an Epson Perfection V700 Photo Scanner (300  
194 dpi, 16-bit, color). The pictures were analyzed in ImageJ (Schneider et al., 2012) (1.51j8) by  
195 measuring the radius in four directions (0°, 90°, 180° and 270°) with the poppy seed as center  
196 point to the colony rim. The four values were averaged. For each replicate, the mean colony  
197 radius was plotted over time to identify the linear growth phase. The slope of the linear growth  
198 phase represents the colony radial growth rate and was estimated by linear regression  
199 standardized by the length of the linear growth phase.

200 The data for colony biomass density (in  $\mu\text{g mm}^{-2}$ ) were obtained in an experiment in which  
201 fungal colonies were grown on PDA covered with sterilized cellophane, allowing easy extraction  
202 of fungal biomass. For each fungal strain, six replicates were set up using colonized poppy  
203 seeds, as above. When fungi reached half of their linear growth phase, colony area was  
204 measured, then biomass was harvested, dried at 45 °C and weighed. Finally, the biomass was  
205 standardized by the colony area (Reeslev and Kjoller, 1995).

206 Furthermore, we included data on hyphal branching angle, hyphal internodal length, hyphal  
207 diameter, mycelial complexity (box counting dimension, describing the degree of detail of a  
208 pattern), and mycelium heterogeneity (lacunarity, i.e. the gappiness or 'rotational and  
209 translational invariance' in a pattern (Karperien, 1999-2013)) and hyphal surface area which  
210 were collected by Lehmann et al. (2018). For further information on experimental set-up and  
211 measurements see supplementary material.

212 *Chemical traits.* We measured hydrophobicity of the fungal surface for fungal material using the  
213 same approach as applied for biomass density measurements, with six replicates per fungal

214 strain. This allowed us to use medium-free fungal material. Half of an individual colony was  
215 used for the hydrophobicity test, which was done using alcohol percentage tests. This is a rapid  
216 and simple way of quantifying hydrophobicity (Chau et al., 2010). Briefly, a series of ethanol  
217 droplets (8  $\mu$ l) with a concentration gradient were placed on the fungal surface to find the  
218 maximum concentration at which the droplet can retain its shape for longer than 5 seconds  
219 (Zheng et al., 2014).

220 Additionally, we included here the enzymatic activity data for laccase, cellobiohydrolase, leucine  
221 aminopeptidase and acid phosphatase, previously measured by Zheng et al. (Zheng et al.,  
222 2018). For further information, see supplementary material.

223 *Biological trait.* The palatability of the 31 fungal strains was tested in a feeding experiment with  
224 the collembolan *Folsomia candida*. We measured palatability as a proxy for assessing likely  
225 persistence of hyphae in the environment, as a way to assess possible interaction with other soil  
226 biota. Fungal mycelium was grown on glass fiber filter papers (696, VWR European Cat. No.  
227 516-0877) cut into 1 cm<sup>2</sup> pieces of which four were placed in Petri dishes filled with plaster of  
228 Paris and charcoal (3:1 mixture). There were 31 fungal treatments and a non-fungal control  
229 (glass fiber filters only), each with eight replicates resulting in 256 experimental units. The  
230 experiment started with the addition of ten individuals of Collembola of the same age and  
231 developmental stage; the animals were previously starved for seven days. After three days of  
232 incubation in the dark at room temperature (22°C), experimental units were checked for  
233 numbers of alive Collembola and subsequently were frozen at -20°C to stop any activity. Finally,  
234 the number of fecal pellets per dish were measured and standardized by number of surviving  
235 Collembola (fecal pellets \*no. of individuals<sup>-1</sup>).

236

#### 237 2.4. Statistics

238

239 First, for investigating soil aggregate formation (SAF) capability of the 31 fungal strains, we  
240 tested fungal performances against the corresponding control samples using a generalized least  
241 square model (glms with  $n = 10 * 32 = 320$ ) in the 'nlme' package (Pinheiro et al., 2018); we  
242 accounted for heteroscedasticity by implementing different variances per stratum for fungal  
243 strains by using the varIdent function (Zuur et al., 2009). To test for differences in SAF  
244 performance of different phyla we used analysis of variance ( $n = 31$ ) with subsequent pairwise  
245 comparisons via TukeyHSD() function. For all models, we tested for normality and homogeneity  
246 of model residuals.



247 Second, we applied principal components analysis to investigate the 15-dimensional trait space  
248 and the distribution of fungal strains therein. For this, we used the `prcomp()` function in the basic  
249 'stats' package; we used z-transformed data. To reduce the dimensionality of our dataset we  
250 tested for PC axis significance via the function `testdim()` (Dray, 2008) in the package 'ade4'  
251 (Chessel et al., 2004; Dray and Dufour, 2007; Dray et al., 2007). We found that the first two  
252 axes were significant and hence used these for the PCA biplot. We added species occurrence  
253 probability information to the biplot by applying the kernel density estimation following the  
254 approach of Diaz et al. (Diaz et al., 2016). For this, we used the `kde()` function in the package  
255 "ks" (Duong, 2018) and implemented an unconstrained bandwidth selector via the function `Hpi()`  
256 for our first two PC axes. We estimated contour probabilities for 0.5, 0.95 and 0.99 quantiles  
257 with the function `contourLevels()`. Additionally, we tested for collinearity between our 15 trait  
258 variables by using Pearson's rho. A threshold of  $|\rho| > 0.7$  was defined as an indicator of  
259 collinearity (Dormann et al., 2013).

260 Third, we applied a permutation-based random forest algorithm (Hapfelmeier and Ulm, 2013) to  
261 identify informative trait variables which are important for soil aggregate formation (SAF).  
262 Random forest (Breiman, 2001) is one of the machine learning algorithms with highest accuracy  
263 (Douglas et al., 2011; Crisci et al., 2012), and is capable of detecting nonlinear relationships  
264 even among higher order interactions in a nonparametric manner (Ryo and Rillig, 2017; Ryo et  
265 al., 2018), while being robust to multicollinearity (Nicodemus et al., 2010). SAF was regressed  
266 with all the trait variables, and the model performance was evaluated in terms of explanatory  
267 power (i.e. variability explained,  $R^2_{\text{exp}}$ ) and predictability using out-of-bag cross validation  
268 (Breiman, 1996) ( $R^2_{\text{pred}}$ ). The relative importance of the trait variables was quantified with a  
269 mean squared error measure, indicating how much each of the trait variables contributes to the  
270 model predictability (Breiman, 2001). In addition, statistical significance of each trait variable ( $p$   
271 = 0.05) was tested via a permutation approach with 2000 iterations (Hapfelmeier and Ulm,  
272 2013). The two parameters of the random forest algorithm (see(Breiman, 2001)) were tuned as  
273 follows: the number of trees in the model (`ntree`) was set to 100 as it made the model stable  
274 (Breiman, 2001); the number of predictors for the randomized split technique (`mtry`) was set to 4  
275 (the square root of the number of predictors (Diaz-Uriarte and de Andres, 2006)).

276 We added the phylogeny of our 31 fungal strains as a numeric predictor variable to the random  
277 forest analysis. To do this, we calculated phylogenetic pairwise distances and fed these into  
278 PCoA via the `cmdscale()` function in the 'stats' package. We calculated the cumulative sum of  
279 the proportion of variance explained by PCo axes based on the eigenvalues and extracted the  
280 first five axes, together explaining up to 80% of phylogenetic variance (Diniz-Filho et al., 1998).

281 After identifying the most relevant predictors, we used partial dependence plots to visualize the  
282 response-predictor relationships obtained from the random forest procedure (Hastie et al.,  
283 2009). For this, we used the `plotPartialDependence()` function of the package 'mlr' (Bischl et al.,  
284 2016).  
285 Fourth, we tested for phylogenetic signals in our 15 trait variables (Table S3) using Moran's I  
286 statistic - a measure of phylogenetic autocorrelation, implemented in the package 'phylosignal'  
287 (Keck et al., 2016).  
288 Fifth, we ran linear regressions on SAF and the three most important predictors identified by the  
289 random forest approach and further evaluated the relationships by quantile regression with the  
290 package 'quantreg' (<https://github.com/cran/quantreg>). Analyzing response-predictor  
291 relationships at their maxima rather than at their means allows for more meaningful inferences  
292 especially for wedge-shaped data distributions (Cade et al., 1999; Cade and Noon, 2003); in  
293 these cases, unmeasured limiting factors could obscure underlying patterns. Model residuals  
294 were tested for homogeneity and normal distribution. If necessary, data were log-transformed.  
295 Sixth, we visually explored soil aggregate formation strategies exemplified by the four best and  
296 poorest performing strains via radar charts applying the eponymous function in the package  
297 'fmsb' (Nakazawa, 2018).  
298 We conducted all analyses in R (R Development Core Team, 2014) (v. 3.4.1) and generated  
299 plots, if not stated otherwise, with the graphic package 'ggplot2' (Wickham, 2009).  
300

## 301 3. Results and Discussion

### 302 3.1. Soil aggregate formation

303  
304 We here measured soil aggregate formation (SAF) capability on a broad set of fungal strains  
305 comprising the phyla Ascomycota, Basidiomycota and Mucoromycota, revealing an overall  
306 significantly positive effect of fungi on soil aggregation: the saprobic fungi increased SAF of the  
307 tested sandy soil by 79% (confidence interval: 61 to 99%; Fig S1) compared to the non-  
308 inoculated controls. The control samples reached a SAF of 3.5% (standard deviation: 0.6) while,  
309 for the fungal treatments, we found a spectrum of SAF with means ranging from 3.7 to 10.3%  
310 with the Mucoromycota strain *Umbelopsis isabellina* and the Ascomycota strain *Cadophora sp.*  
311 at the lower and upper end, respectively (Fig. 2A). Only two strains, namely *Umbelopsis*

312 *isabellina* and *Mortierella* sp.3, had a SAF performance not significantly different from the non-  
313 inoculated controls.

314

315 Our results support the general finding that filamentous soil fungi improve soil aggregation, as  
316 was shown in experiments (Martin and Anderson, 1943; Gilmour et al., 1948; Martin et al., 1958;  
317 Zheng et al., 2014) and a global data synthesis (Lehmann et al., 2017b). However, here we  
318 used for the first time a set of 31 fungal strains comprising three major fungal phyla which were  
319 all isolated from the same soil and tested in their home soil. This set was screened using a  
320 method suitable for the large number of target species. Additionally, we used a straightforward  
321 assay for testing specifically a soil aggregation process component - namely aggregate  
322 formation.

323 Our choice of methods also has limitations. Using this approach, we only focused on one a  
324 *a priori* size limit for newly formed aggregates, thus not capturing any dynamics in smaller sizes  
325 classes. Furthermore, the small amount of soil used in our design did not allow us to measure  
326 aggregate size distributions. As discussed previously (Aguilar-Trigueros et al., 2015). We here  
327 evaluated fungal contribution to soil aggregation in isolation, not taking into account how such  
328 effects might be modified by other soil organisms. However, such species interactions can be  
329 clearly important; for example, a recent meta-analysis revealed that soil biota combinations (e.g.  
330 bacteria-fungi mixtures) result in significantly increased soil aggregation (Lehmann et al.,  
331 2017b). Hence future studies should also consider species combinations when evaluating soil  
332 biota contributions to soil aggregation.

333

334 In our experiment, each of the three tested fungal phyla contained strains that were effective  
335 and poorly performing; however, overall, the four most efficient aggregate formers were  
336 members of the Ascomycota while three of the poorest aggregate formers belonged to the  
337 Mucoromycota (Fig. 2B). For our tested suite of fungi, we found that the Ascomycota, in  
338 general, had significantly higher SAF than the Mucoromycota. These findings correspond with  
339 previous reports (Lynch and Elliott, 1983; Tisdall et al., 2012; Lehmann et al., 2017b) and  
340 suggest that phylogeny is a strong factor determining SAF capability. However, it still remains  
341 unclear which fungal traits contribute to these phylum-specific differences and overall variability  
342 in SAF capability. Thus, in the next step, we used a trait database comprising morphological,  
343 chemical and biotic traits to explore their importance for SAF.

344

345 3.2. *Trait collection*

346

347 We included 15 fungal traits (measured on the level of a fungal individual or ‘colony’) and found  
348 strong variability in their expression across the 31 fungal strains (Fig. 3). In terms of  
349 morphological features, we found in our experiments that the measured branching angles  
350 ranged from 26 to 86° for Mucoromycota with widest and Basidiomycota with narrowest angles,  
351 while for hyphal diameter, the highest and lowest values (2.7 to 6.5  $\mu\text{m}$ ) were both found in the  
352 Mucoromycota. Basidiomycota had the highest internodal length (453  $\mu\text{m}$ ) while in  
353 Mucoromycota distances as short as 40  $\mu\text{m}$  between two branches were detected. The  
354 mycelium complexity measurements revealed trait values between 1.2 (Basidiomycota) and 1.6  
355 (Mucoromycota), where a value of 1 represents a single, unbranched hypha and a value of 2 a  
356 complex, space-filling structure. Mycelium heterogeneity varied between 0.4 and 0.7 for Basidio-  
357 and Ascomycota, respectively, with higher values indicating increasing structural gappiness. For  
358 hyphal length in soil, we found 7 to 20 m hyphae per g soil for Ascomycota and Basidiomycota,  
359 respectively, with 4.6  $\text{m g}^{-1}$  of hyphal background. The largest hyphal surface area was found in  
360 Mucoromycota with 3.4  $\mu\text{m}^2$  while the smallest was detected for an Ascomycota strain with 0.8  
361  $\mu\text{m}^2$ . For biomass density, values ranged between 0.02 and 0.2  $\text{mg cm}^{-2}$  for Basidiomycota and  
362 Ascomycota, respectively. Among the Mucoromycota the strain with the highest colony radial  
363 extension rate with 373  $\mu\text{m h}^{-1}$  was found while the slowest extending strain was a member of  
364 the Ascomycota.

365 Next, the exploration of the chemical traits revealed that across all phyla, hydrophilic mycelia  
366 could be found while Basidiomycota showed the strongest detectable mycelial hydrophobicity  
367 (60% ethanol molarity). The enzyme profiling revealed that cellobiohydrolase was not produced  
368 by Mortierellales, an order of the Mucoromycota, while the highest activity was found in the  
369 Ascomycota (0.13 U  $\text{mg}^{-1}$ ). In contrast, laccase and acid phosphatase activities were lowest in  
370 Ascomycota and highest in Basidiomycota (laccase: 0.01 to 10.4 U  $\text{mg}^{-1}$ ; acid phosphatase:  
371 0.01 to 1.8 U  $\text{mg}^{-1}$ ). The production of leucine aminopeptidase was highest in Mucoromycota  
372 and lowest in Ascomycota (0.09 to 7.1 U  $\text{mg}^{-1}$ ).

373 We measured palatability as a biotic trait and found that the most and least attractive strains  
374 belonged to the Ascomycota (5 to 123 fecal pellets per individual collembolan).

375

376 Here, we established a collection of soft traits measured under standardized conditions with  
377 reproducible methods which are applicable for a broad range of fungal strains with high intra-  
378 and interspecific variability in morphological, chemical and biotic features. Our values are within

379 the range of previously reported fungal traits (e.g. Trinci, 1969; Ho, 1978; Obert et al., 1990;  
380 Baldrian et al., 2011; Eichlerova et al., 2015).  
381 However, it is important to note that these findings result from trait data measured on a  
382 homogenous, standardized growth substrate not accounting for the heterogeneous nature of  
383 soil with its inherent structure and also physical, chemical and biotic factors influencing the  
384 fungal trait expression. It is well known that fungal mycelia are versatile, dynamic and modular  
385 constructs; they not only modify their environment during foraging but also react to it (Ritz and  
386 Young, 2004). As demonstrated using the model organism *Rhizoctonia solani*, nutrient  
387 distribution and soil bulk density can alter e.g. hyphal growth patterns and thus mycelium  
388 density (Harris et al., 2003; Boswell et al., 2007). Future studies would need to take into account  
389 the soil heterogeneity.

390

### 391 3.3. *Fungal trait space*

392

393 We investigated the resulting 15-dimensional trait space and the fungal strain probability  
394 occurrence therein (Fig. 4A). We constructed the trait space by ordination (principal components  
395 analysis) and hence converted individual strains into unique trait combinations whose  
396 coordinates are determined by their trait expression (Crowther et al., 2014; Aguilar-Trigueros et  
397 al., 2015). We found that 42% of the variability in the fungal traits was accounted for in the first  
398 two PC axes which were the only significant axes (Table S4). Due to indication of strong trait  
399 correlations, we tested our data for collinearity. We detected only one case of collinearity  
400 ( $|\text{pearson's rho}| > 0.7$ ) for mycelium complexity and hyphal surface area (Fig. S2).

401

402 Evaluating the species occurrence, we found that Ascomycota strains were distributed in the  
403 lower half of the PC plane whereas the Mucoromycota were localized in the upper left quadrant  
404 mainly characterized by hyphal branching angle, colony radial growth rate and leucine  
405 aminopeptidase activity. In the upper right quadrant, the Basidiomycota grouped driven by  
406 hyphal internodal length and lacunarity. There was a clear separation of the phyla detectable  
407 for PC axis 1 with Ascomycota flanked by Mucoromycota and Basidiomycota but only a  
408 marginal separation between Ascomycota and Mucoromycota on PC axis 2 (Fig. S3). In  
409 general, the trait space revealed a high versatility in our fungal set with no clear syndromes.  
410 However, on the phylum level a clear separation between the three phyla was evident (Fig. S3).

411

412 In the next step, we investigated the importance of the collected fungal traits on SAF using the  
413 random forest approach. Considering the strong impact of phylum on SAF and phylogenetic  
414 separation in the trait space, we included phylogenetic pairwise distances as an additional  
415 variable (potentially also capturing not explicitly measured variables) in the following analyses.  
416

#### 417 3.4. *Fungal trait contributions to soil aggregate formation*

418  
419 The random forest algorithm (explanatory power: 36% and predictability: 13%), identified three  
420 significant trait variables: colony biomass density, leucine aminopeptidase activity and  
421 phylogeny (relative importance: 48%, 25% and 13%, explanatory power of each: 17.3%, 9%,  
422 4.7%; Fig. 4B).

423  
424 To visualize the modeled relationship between SAF and the important variables we used partial  
425 dependence plots. After taking into account the effects of all predictors except for the variable of  
426 interest (colony biomass density, leucine aminopeptidase activity or phylogeny, respectively),  
427 partial dependence plots depict the relationships between the predictor and the response  
428 variable (SAF). We found that SAF increased with increasing colony biomass density (Fig. 4C)  
429 but decreased with increasing leucine aminopeptidase activity (Fig. 4D). Across the phylogeny,  
430 from Mucoromycota to Ascomycota, we found a positive relationship with SAF (Fig. 4E). These  
431 findings were supported by linear and quantile regression analyses (Fig. 4F to 4H, Table S5).  
432 Here, we found that the relationship between SAF and colony biomass density was best  
433 represented by mean regression. For the relationships between SAF and leucine  
434 aminopeptidase activity as well as SAF and phylogeny, the 0.95 and 0.05 quantile, respectively,  
435 showed the highest fit.

436  
437 Our analyses revealed that fungal strains belonging to the Ascomycota that have high biomass  
438 density and low leucine aminopeptidase activity have the highest probability to form aggregates  
439 compared to other strains. Furthermore, we found that a colony biomass density above 0.08 mg  
440 cm<sup>-2</sup> and a leucine aminopeptidase activity less than 1.8 U g<sup>-1</sup> do not further improve SAF (Fig.  
441 4C and 4D).

442 Our findings further support the assumption that phylogeny influences aggregate forming  
443 capability of fungi (Fig. 3B and Fig. 4H). We interpret this to mean that traits (including  
444 unmeasured traits) expressed by strains of this phylum contribute to this beneficial impact on  
445 soil aggregation. Considering all possible traits and their expression, the four most efficient

446 aggregate former were all Ascomycota with low leucine aminopeptidase activity and dense  
447 mycelia.

448 A densely growing fungus likely can more intensively cross-link and enmesh particles with its  
449 hyphae, and thus perhaps is more effective at contributing to the formation of macroaggregates;  
450 however, so far there has not been direct evidence of this. Interestingly, the total amount of  
451 hyphae produced was not an important explanatory variable (Fig. 2; HLs = hyphal length in soil)  
452 suggesting that a critical local density is much more important than total hyphal production. This  
453 also explains results from previous experiments, where total hyphal length or biomass did not  
454 predict soil aggregation effects (e.g. Piotrowski et al., 2004). Fungi with high biomass density  
455 had low radial colony extension rate (Fig. S2); thus it can be expected that their positive effect  
456 on SAF is highly localized not reaching beyond their area of mycelial influence.

457 Fungi with low leucine aminopeptidase activity are inefficient in hydrolyzing peptides and thus  
458 degrading organic matter components, which may be functioning as glues and cementing  
459 agents in aggregates (Chenu, 1989; Caesar-TonThat and Cochran, 2000; Daynes et al., 2012).

460 Fungi with either one of these traits are more likely able to bring soil particles and aggregates  
461 together via their hyphae; lacking the enzyme to degrade organic matter holding together  
462 aggregates also contributes to this effect.

463 This holds true especially in soils with high sand content as-used in our assay. In such soils,  
464 fungi are an essential factor in soil aggregation mainly via physical and chemical interactions of  
465 hyphae with sand particles forming and stabilizing the otherwise unstable substrate (Sutton and  
466 Sheppard, 1976; Forster and Nicolson, 1981). We here chose the soil from which our fungi were  
467 originally cultured. However, soil type as a major variable affecting fungi and their soil  
468 aggregation capability has to be the main target of future studies.

469  
470 After identifying the most important fungal traits for SAF, we focused on those fungi that are  
471 present at the lower and upper end of the SAF spectrum. The most efficient strains were all  
472 members of the Ascomycota (*Cadophora sp.*, *Pleosporales sp.*, *Alternaria sp.*, *Fusarium sp.*)  
473 while the group of the poor performer comprised mainly Mucoromycota but also one  
474 ascomycete (*Umbelopsis isabellina*, *Mortierella sp.* (no. 3), *Mucor fragilis*, *Truncatella angustata*  
475 (Fig.1 and Fig.3). As expected, the efficient soil aggregate forming strains had high biomass  
476 density but low leucine aminopeptidase activity (Fig. 5). The opposite was true for the poor  
477 performers. In addition to these two clear features, the efficient strains tended to have lower  
478 colony radial growth rates, hyphal surface area and surface hydrophobicity, but had larger

479 hyphal diameters and more heterogeneously structured mycelia as the four poorest soil  
480 aggregators.

481

## 482 4. Conclusions

483

484 Our results yield new insights into fungal traits important for soil aggregation, and thus also shed  
485 light on mechanisms of soil aggregation. Clearly, future work should focus on hyphal density as  
486 a key trait. In an applied context of restoration and agriculture, our trait information can be  
487 incorporated in management practices affecting the fungal environment in soil to favor the  
488 development of more dense fungal mycelia by e.g. carbon input or through a screen for isolates  
489 exhibiting desired traits under the soil conditions in which they will be used.

490

491 Even though we here focused on saprobic soil fungi, some aspects may also be generalizable  
492 to other fungal groups. For example, future work should test if hyphal density is also a better  
493 predictor for soil aggregation ability than hyphal biomass production in arbuscular mycorrhizal  
494 fungi. On the other hand, it will also be important to extend the dataset of fungal traits and soil  
495 aggregation beyond soil saprobes, since the relative importance of traits and trait combinations  
496 could vary; for example, since arbuscular mycorrhizal fungi have limited enzymatic abilities  
497 (Tisserant et al., 2013), this trait would play no role in that particular group. In the end, our study  
498 demonstrates the power of employing a trait-based approach to tackle biological mechanisms of  
499 soil aggregation; this can now also be extended to organism groups other than fungi.

500

### 501 **References**

502 Aguilar-Trigueros, C.A., Hempel, S., Powell, J.R., Anderson, I.C., Antonovics, J., Bergmann, J.,  
503 Cavagnaro, T.R., Chen, B.D., Hart, M.M., Klironomos, J., Petermann, J.S., Verbruggen, E.,  
504 Veresoglou, S.D., Rillig, M.C., 2015. Branching out: Towards a trait-based understanding of  
505 fungal ecology. *Fungal Biology Reviews* 29, 34-41.

506 Andrade-Linares, D.R., Veresoglou, S.D., Rillig, M.C., 2016. Temperature priming and memory  
507 in soil filamentous fungi. *Fungal Ecology* 21, 10-15.



- 508 Baldrian, P., Voriskova, J., Dobiasova, P., Merhautova, V., Lisa, L., Valaskova, V., 2011.  
509 Production of extracellular enzymes and degradation of biopolymers by saprotrophic microfungi  
510 from the upper layers of forest soil. *Plant and Soil* 338, 111-125.
- 511 Bardgett, R.D., van der Putten, W.H., 2014. Belowground biodiversity and ecosystem  
512 functioning. *Nature* 515, 505-511.
- 513 Bischl, B., Lang, M., Kotthoff, L., Schiffner, J., Richter, J., Studerus, E., Casalicchio, G., Jones,  
514 Z.M., 2016. mlr: Machine Learning in R. *Journal of Machine Learning Research* 17.
- 515 Boswell, G.P., Jacobs, H., Ritz, K., Gadd, G.M., Davidson, F.A., 2007. The development of  
516 fungal networks in complex environments. *Bulletin of Mathematical Biology* 69, 605-634.
- 517 Breiman, L., 1996. Out-of-bag estimation.  
518 <https://www.stat.berkeley.edu/users/breiman/OOBestimation.pdf>.
- 519 Breiman, L., 2001. Random Forests. *Machine Learning* 45, 5-32.
- 520 Bronick, C.J., Lal, R., 2005. Soil structure and management: a review. *Geoderma* 124, 3-22.
- 521 Cade, B.S., Noon, B.R., 2003. A gentle introduction to quantile regression for ecologists.  
522 *Frontiers in Ecology and the Environment* 1, 412-420.
- 523 Cade, B.S., Terrell, J.W., Schroeder, R.L., 1999. Estimating effects of limiting factors with  
524 regression quantiles. *Ecology* 80, 311-323.
- 525 Caesar-TonThat, T.C., Cochran, V.L., 2000. Soil aggregate stabilization by a saprophytic lignin-  
526 decomposing basidiomycete fungus - I. Microbiological aspects. *Biology and Fertility of Soils* 32,  
527 374-380.
- 528 Chau, H.W., Goh, Y.K., Si, B.C., Vujanovic, V., 2010. Assessment of alcohol percentage test for  
529 fungal surface hydrophobicity measurement. *Letters in Applied Microbiology* 50, 295-300.
- 530 Chenu, C., 1989. Influence of a fungal polysaccharide, scleroglucan, on clay microstructure. *Soil*  
531 *Biology & Biochemistry* 21, 299-305.

- 532 Chessel, D., Dufour, A.B., Thioulouse, J., 2004. The ade4 package - I : One-table methods. R  
533 News 4, 5-10.
- 534 Crisci, C., Ghattas, B., Perera, G., 2012. A review of supervised machine learning algorithms  
535 and their applications to ecological data. *Ecological Modelling* 240, 113-122.
- 536 Crowther, T.W., Maynard, D.S., Crowther, T.R., Peccia, J., Smith, J.R., Bradford, M.A., 2014.  
537 Untangling the fungal niche: the trait-based approach. *Frontiers in Microbiology* 5, 1-12.
- 538 Daynes, C.N., Zhang, N., Saleeba, J.A., McGee, P.A., 2012. Soil aggregates formed in vitro by  
539 saprotrophic Trichocomaceae have transient water-stability. *Soil Biology & Biochemistry* 48,  
540 151-161.
- 541 Diaz-Uriarte, R., de Andres, S.A., 2006. Gene selection and classification of microarray data  
542 using random forest. *BMC Bioinformatics* 7.
- 543 Diaz, S., Kattge, J., Cornelissen, J.H.C., Wright, I.J., Lavorel, S., Dray, S., Reu, B., Kleyer, M.,  
544 Wirth, C., Prentice, I.C., Garnier, E., Bonisch, G., Westoby, M., Poorter, H., Reich, P.B., Moles,  
545 A.T., Dickie, J., Gillison, A.N., Zanne, A.E., Chave, J., Wright, S.J., Sheremet'ev, S.N., Jactel,  
546 H., Baraloto, C., Cerabolini, B., Pierce, S., Shipley, B., Kirkup, D., Casanoves, F., Joswig, J.S.,  
547 Gunther, A., Falczuk, V., Ruger, N., Mahecha, M.D., Gorne, L.D., 2016. The global spectrum of  
548 plant form and function. *Nature* 529, 167-173.
- 549 Diniz-Filho, J.A.F., de Sant'Ana, C.E.R., Bini, L.M., 1998. An eigenvector method for estimating  
550 phylogenetic inertia *Evolution* 52, 1247-1262.
- 551 Dormann, C.F., Elith, J., Bacher, S., Buchmann, C., Carl, G., Carre, G., Marquez, J.R.G.,  
552 Gruber, B., Lafourcade, B., Leitao, P.J., Munkemuller, T., McClean, C., Osborne, P.E.,  
553 Reineking, B., Schroder, B., Skidmore, A.K., Zurell, D., Lautenbach, S., 2013. Collinearity: a  
554 review of methods to deal with it and a simulation study evaluating their performance.  
555 *Ecography* 36, 27-46.

- 556 Douglas, P.K., Harris, S., Yuille, A., Cohen, M.S., 2011. Performance comparison of machine  
557 learning algorithms and number of independent components used in fMRI decoding of belief vs.  
558 disbelief. *NeuroImage* 56, 544-553.
- 559 Dray, S., 2008. On the number of principal components: A test of dimensionality based on  
560 measurements of similarity between matrices. *Computational Statistics & Data Analysis* 52,  
561 2228-2237.
- 562 Dray, S., Dufour, A.B., 2007. The ade4 package: Implementing the duality diagram for  
563 ecologists. *Journal of Statistical Software* 22, 1-20.
- 564 Dray, S., Dufour, A.B., Chessel, D., 2007. The ade4 package-II: Two-table and K-table  
565 methods. *R News* 7, 47-52.
- 566 Drummond, A.J., Rambaut, A., 2007. BEAST: Bayesian evolutionary analysis by sampling  
567 trees. *BMC Evolutionary Biology* 7.
- 568 Duong, T., 2018. ks: Kernel smoothing, R package version 1.11.0. ed.
- 569 Edgar, R.C., 2004. MUSCLE: multiple sequence alignment with high accuracy and high  
570 throughput. *Nucleic Acids Research* 32, 1792-1797.
- 571 Eichlerova, I., Homolka, L., Zifcakova, L., Lisa, L., Dobiasova, P., Baldrian, P., 2015. Enzymatic  
572 systems involved in decomposition reflects the ecology and taxonomy of saprotrophic fungi.  
573 *Fungal Ecology* 13, 10-22.
- 574 Forster, S.M., Nicolson, T.H., 1981. Microbial aggregation of sand in a maritime dune  
575 succession. *Soil Biology and Biochemistry* 13, 205-208.
- 576 Gams, W., Domsch, K.H., 1967. Beitrage zur Anwendung der Bodenwaschtechnik für die  
577 Isolierung von Bodenpilzen. *Arch. Mikrobiol.* 58, 134-144.

- 578 Gilmour, C.M., Allen, O.N., Truog, E., 1948. Soil aggregation as influenced by the growth of  
579 mold species, kind of soil, and organic matter. Soil Science Society of America Proceedings 13,  
580 292-296.
- 581 Hapfelmeier, A., Ulm, K., 2013. A new variable selection approach using Random Forests.  
582 Computational Statistics & Data Analysis 60, 50-69.
- 583 Harris, K., Young, I.M., Gilligan, C.A., Otten, W., Ritz, K., 2003. Effect of bulk density on the  
584 spatial organisation of the fungus *Rhizoctonia solani* in soil. FEMS Microbiology Ecology 44, 45-  
585 56.
- 586 Hastie, T., Tibshirani, R., Friedman, J., 2009. The elements of statistical learning: Data mining,  
587 inference, and prediction, 2 ed. Springer, New York.
- 588 Ho, H.H., 1978. Hyphal branching systems in *Phytophthora* and other Phcomycetes.  
589 Mycopathologia 64, 83-86.
- 590 Jakobsen, I., Abbott, L.K., Robson, A.D., 1992. External hyphae of vesicular-arbuscular  
591 mycorrhizal fungi associated with *Trifolium subterraneum* L. 1. Spread of hyphae and  
592 phosphorus inflow into roots. New Phytologist 120, 371-380.
- 593 Karperien, A., 1999-2013. FracLac for ImageJ.
- 594 Keck, F., Rimet, F., Bouchez, A., Franc, A., 2016. phylosignal: an R package to measure, test,  
595 and explore the phylogenetic signal. Ecology and Evolution 6, 2774-2780.
- 596 Lehmann, A., Leifheit, E.F., Rillig, M.C., 2017a. Mycorrhizas and soil aggregation, In: Johnson,  
597 N.C., Gehring, C., Jansa, J. (Eds.), Mycorrhizal mediation of soil, 1 ed. Elsevier, Amsterdam,  
598 Netherlands.
- 599 Lehmann, A., Rillig, M.C., 2015. Understanding mechanisms of soil biota involvement in soil  
600 aggregation: A way forward with saprobic fungi? Soil Biology and Biochemistry 88, 298-302.

- 601 Lehmann, A., Zheng, W., Soutschek, K., Rillig, M.C., 2018. How to build a mycelium: tradeoffs  
602 in fungal architectural traits. bioRxiv.
- 603 Lehmann, A., Zheng, W.S., Rillig, M.C., 2017b. Soil biota contributions to soil aggregation.  
604 Nature Ecology & Evolution 1, 1828-1835.
- 605 Lynch, J.M., Elliott, L.F., 1983. Aggregate stabilization of volcanic ash and soil during microbial-  
606 degradation of straw. Applied and Environmental Microbiology 45, 1398-1401.
- 607 Martin, J.P., Ervin, J.O., Shepherd, R.A., 1958. Decomposition and aggregating effect of fungus  
608 cell material in soil. Soil Science Society of America Journal.
- 609 Martin, T.L., Anderson, D.A., 1943. Organic matter decomposition, mold flora, and soil  
610 aggregation relationships. Soil Science Society of America Journal 7, 215-217.
- 611 Nakazawa, M., 2018. fmsb: Functions for Medical Statistics Book with some Demographic Data,  
612 0.6.3 ed.
- 613 Nascimento, F.F., dos Reis, M., Yang, Z.H., 2017. A biologist's guide to Bayesian phylogenetic  
614 analysis. Nature Ecology & Evolution 1, 1446-1454.
- 615 Nicodemus, K.K., Malley, J.D., Strobl, C., Ziegler, A., 2010. The behaviour of Random Forest  
616 permutation-based variable importance measures under predictor correlation. BMC  
617 Bioinformatics 11.
- 618 Obert, M., Pfeifer, P., Sernetz, M., 1990. Microbial growth patterns described by fractal  
619 geometry. Journal of Bacteriology 172, 1180-1185.
- 620 Pinheiro, J., Bates, D., DebRoy, S., Sarkar, D., Team, R.C., 2018. nlme: Linear and Nonlinear  
621 Mixed Effects Models, 3.1-137 ed.
- 622 Piotrowski, J.S., Denich, T., Klironomos, J.N., Graham, J.M., Rillig, M.C., 2004. The effects of  
623 arbuscular mycorrhizas on soil aggregation depend on the interaction between plant and fungal  
624 species. New Phytologist 164, 365-373.

- 625 R Development Core Team, 2014. R: A language and environment for statistical computing,  
626 3.4.1 ed.
- 627 Reeslev, M., Kjoller, A., 1995. Comparison of biomass dry weights and radial growth-rates of  
628 fungal colonies on media solidified with different gelling compounds. *Applied and Environmental*  
629 *Microbiology* 61, 4236-4239.
- 630 Rillig, M.C., Aguilar-Trigueros, C.A., Bergmann, J., Verbruggen, E., Veresoglou, S.D., Lehmann,  
631 A., 2015. Plant root and mycorrhizal fungal traits for understanding soil aggregation. *New*  
632 *Phytologist* 205, 1385-1388.
- 633 Ritz, K., Young, I.M., 2004. Interactions between soil structure and fungi. *Mycologist* 18, 52-59.
- 634 Ryo, M., Harvey, E., Robinson, C.T., Altermatt, F., 2018. Nonlinear higher order abiotic  
635 interactions explain riverine biodiversity. *Journal of Biogeography* 45, 628-639.
- 636 Ryo, M., Rillig, M.C., 2017. Statistically reinforced machine learning for nonlinear patterns and  
637 variable interactions. *Ecosphere* 8.
- 638 Schneider, C.A., Rasband, W.S., Eliceiri, K.W., 2012. NIH Image to ImageJ: 25 years of image  
639 analysis. *Nature Methods* 9, 671-675.
- 640 Siddiky, M.R.K., Kohler, J., Cosme, M., Rillig, M.C., 2012a. Soil biota effects on soil structure:  
641 Interactions between arbuscular mycorrhizal fungal mycelium and collembola. *Soil Biology &*  
642 *Biochemistry* 50, 33-39.
- 643 Siddiky, M.R.K., Schaller, J., Caruso, T., Rillig, M.C., 2012b. Arbuscular mycorrhizal fungi and  
644 collembola non-additively increase soil aggregation. *Soil Biology & Biochemistry* 47, 93-99.
- 645 Six, J., Bossuyt, H., Degryze, S., Deneff, K., 2004. A history of research on the link between  
646 (micro)aggregates, soil biota, and soil organic matter dynamics. *Soil & Tillage Research* 79, 7-  
647 31.

- 648 Spatafora, J.W., Chang, Y., Benny, G.L., Lazarus, K., Smith, M.E., Berbee, M.L., Bonito, G.,  
649 Corradi, N., Grigoriev, I., Gryganskyi, A., James, T.Y., O'Donnell, K., Roberson, R.W., Taylor,  
650 T.N., Uehling, J., Vilgalys, R., White, M.M., Stajich, J.E., 2016. A phylum-level phylogenetic  
651 classification of zygomycete fungi based on genome-scale data. *Mycologia* 108, 1028-1046.
- 652 Sutton, J.C., Sheppard, B.R., 1976. AGGREGATION OF SAND-DUNE SOIL BY  
653 ENDOMYCORRHIZAL FUNGI. *Canadian Journal of Botany-Revue Canadienne De Botanique*  
654 54, 326-333.
- 655 Tennant, D., 1975. Test of a modified line intersect method of estimating root length. *Journal of*  
656 *Ecology* 63, 995-1001.
- 657 Thorn, R.G., Reddy, C.A., Harris, D., Paul, E.A., 1996. Isolation of saprophytic basidiomycetes  
658 from soil. *Applied and Environmental Microbiology* 62, 4288-4292.
- 659 Tisdall, J.M., Nelson, S.E., Wilkinson, K.G., Smith, S.E., McKenzie, B.M., 2012. Stabilisation of  
660 soil against wind erosion by six saprotrophic fungi. *Soil Biology & Biochemistry* 50, 134-141.
- 661 Tisdall, J.M., Oades, J.M., 1982. Organic-matter and water-stable aggregates in soils. *Journal of*  
662 *Soil Science* 33, 141-163.
- 663 Tisserant, E., Malbreil, M., Kuo, A., Kohler, A., Symeonidi, A., Balestrini, R., Charron, P.,  
664 Duensing, N., Frei dit Frey, N., Gianinazzi-Pearson, V., Gilbert, L.B., Handa, Y., Herr, J.R., Hijri,  
665 M., Koul, R., Kawaguchi, M., Krajinski, F., Lammers, P.J., Masclaux, F.G., Murat, C., Morin, E.,  
666 Ndikumana, S., Pagni, M., Petitpierre, D., Requena, N., Rosikiewicz, P., Riley, R., Saito, K., San  
667 Clemente, H., Shapiro, H., van Tuinen, D., Bécard, G., Bonfante, P., Paszkowski, U., Shachar-  
668 Hill, Y.Y., Tuskan, G.A., Young, J.P.W., Sanders, I.R., Henrissat, B., Rensing, S.A., Grigoriev,  
669 I.V., Corradi, N., Roux, C., Martin, F., 2013. Genome of an arbuscular mycorrhizal fungus  
670 provides insight into the oldest plant symbiosis. *Proceedings of the National Academy of*  
671 *Sciences* 110, 20117-20122.
- 672 Trinci, A.P.J., 1969. A kinetic study of the growth of *Aspergillus nidulans* and other fungi.  
673 *Journal of Genetic Microbiology* 57, 11-24.

674 Wall, D.H., Nielsen, U.N., Six, J., 2015. Soil biodiversity and human health. *Nature* 528, 69-76.

675 Wickham, H., 2009. *ggplot2: Elegant graphics for data analysis*. Springer, New York.

676 Young, I.M., Crawford, J.W., 2004. Interactions and self-organization in the soil-microbe  
677 complex. *Science* 304, 1634-1637.

678 Zheng, W., Lehmann, A., Ryo, M., Valyi, K., Rillig, M.C., 2018. Growth rate trades off with  
679 enzymatic investment in soil filamentous fungi. *bioRxiv*.

680 Zheng, W.S., Morris, E.K., Lehmann, A., Rillig, M.C., 2016. Interplay of soil water repellency,  
681 soil aggregation and organic carbon. A meta-analysis. *Geoderma* 283, 39-47.

682 Zheng, W.S., Morris, E.K., Rillig, M.C., 2014. Ectomycorrhizal fungi in association with *Pinus*  
683 *sylvestris* seedlings promote soil aggregation and soil water repellency. *Soil Biology &*  
684 *Biochemistry* 78, 326-331.

685 Zuur, A.F., Ieno, E.N., Walker, N.J., Saveliev, A.A., Smith, G.M., 2009. Mixed effects models  
686 and extensions in ecology with R. Springer, UK, pp. 75-76.

687

### 688 **Acknowledgements**

689 This work was supported by the Deutsche Forschungsgemeinschaft (RI 1815/16-1).

690

### 691 **Author contributions**

692 A.L. designed and performed the research; W.Z. and M.R. contributed analytical tools; A.L,  
693 W.Z., K.S, R.R. and S.M. provided experimental data; J.R. created the phylogenetic tree; A.L.  
694 and M.C.R. wrote the manuscript; all authors contributed to the final version of the manuscript.

695

### 696 **Competing interest**

697 The authors declare no conflicts of interest.

698



699 **Additional information**

700 Supplementary information is available for this paper (Supplementary Information and  
701 Supplementary Data).

702

## 703 **Figure legends**

704

705 **Fig.1. Overview of fungal strains.** Phylogenetic tree (maximum clade-credibility tree) of the 31 saprobic  
706 fungal strains comprising members of the phyla Ascomycota, Basidiomycota and Mucoromycota.  
707 Following the order of the tree, images of four week old colonies grown on PDA are assigned to the tree.  
708 Further information about phylogeny and accession numbers of the 31 fungal strains are available in  
709 Table S2. Strains performing best and poorest are marked; blue symbols represent good and red  
710 symbols poor aggregators.

711

712 **Fig. 2. Soil aggregate formation capability.** (a) Tukey boxplots of the soil aggregate formation (SAF  
713 with  $n=10 \times 31$  in %) capability of the 31 fungal strains. The dashed line represents the average SAF of  
714 the controls ( $n=10$ , mean= 3.5, SD=0.59) (b) Soil aggregate formation capability depicted on phylum level  
715 (pairwise comparisons: Ascomycota - Basidiomycota:  $p=0.47$ , Ascomycota - Mucoromycota:  $p=0.03$ ,  
716 Basidiomycota - Mucoromycota:  $p=0.66$ ;  $n=31$ ).

717

718 **Fig. 3. Trait distributions.** Tukey boxplots of the 15 trait variables comprising morphological, chemical  
719 and biotic fungal features. Here, we present data on branching angle (BA with  $n=5$  in  $^\circ$ ), hyphal diameter  
720 (D with  $n=5$  in  $\mu\text{m}$ ), internodal length (IL with  $n=5$  in  $\mu\text{m}$ ), boxcounting dimension (Db with  $n=8$ , unitless),  
721 lacunarity (L with  $n=8$ , unitless), hyphal length in soil (HLs with  $n=10$  in  $\text{m/g}$ ), hyphal surface area (HSA  
722 with  $n=8$  in  $\mu\text{m}^2$ ), biomass density (Den with  $n=6$  in  $\text{mg}\cdot\text{cm}^{-2}$ ), radial colony extension rate (Kr with  $n=5$   
723 in  $\mu\text{m}\cdot\text{h}^{-1}$ ), hydrophobicity of fungal surfaces (HPB with  $n=6$  in % of ethanol molarity), cellobiohydrolase  
724 (Cel), laccase (Lac), leucine aminopeptidase (Leu) and acid phosphatase (Pho) activity (each with  $n=5$  in  
725  $\text{unit}\cdot\text{g}^{-1}$  dry mass) and palatability (PT with  $n=8$  in no. of fecal pellets per collembolan individual). The  
726 boxplots represent 25th and 75th percentile, median and outlying points. Information about phylum  
727 affiliation is colour-coded (black: Mucoromycota, grey: Basidiomycota, white: Ascomycota). The grey  
728 dashed line for the trait hyphal length in soil represents mean of corresponding trait controls.

729

730 **Fig. 4. Outcomes of principal components analysis, random forest analysis and relationships**  
731 **between soil aggregate formation (SAF) and important trait variables.** Analyses were conducted on  
732 trait mean data ( $n=31$ ). **(A)** Projection of the ordinated 31 fungal strains onto 15 trait variables comprising  
733 morphological, chemical and biotic characteristics into two dimensional trait space represented by  
734 principal component axis 1 and 2 (explaining 23 and 19% of variance, respectively). The trait variables  
735 are branching angle (BA), hyphal diameter (D), internodal length (IL), boxcounting dimension (Db),  
736 lacunarity (L), hyphal length in soil (HLs), hyphal surface area (HSA), biomass density (Den), radial  
737 colony extension rate (Kr), hydrophobicity of fungal surfaces (HPB), cellobiohydrolase (Cel), laccase  
738 (Lac), leucine aminopeptidase (Leu) and acid phosphatase (Pho) activity and palatability (PT). Arrows  
739 indicate direction and weight of trait vectors. Colour gradient represents probability of species occurrence

740 (white = low, red = high) in the trait space, with the contour lines denoting the 0.50, 0.95 and 0.99  
741 quantiles of kernel density estimation (see materials and methods section). **(B)** Overall importance of trait  
742 variables for soil aggregate formation capability with  $R^2_{expl} = 0.36$ ,  $R^2_{pred} = 0.13$  and three statistically  
743 significant predictor variables. Asterisks denote significance level: \*\*\* < 0.0001, \*\* 0.001, \* 0.01, . 0.5.  
744 Pairwise phylogenetic distance was included as PCo- axes (see materials and methods section). **(C-E)**  
745 Partial dependence plots for the three most important and significant trait variables identified by random  
746 forest approach. The x-axis labels are identical with panels F, G and H, respectively.  
747 **(F-H)** Relationships between SAF and the three most important trait variables. Corresponding regression  
748 statistics can be found in Table S5. Phylum affiliation of fungal strains is colour-coded (black:  
749 Mucoromycota, grey: Basidiomycota, white: Ascomycota). Red and blue lines represent linear and  
750 quantile regression lines, respectively. The line type depicts significance of regression lines with solid <  
751 0.05 and dashed > 0.05.

752  
753 **Fig. 5.** Radar plot depicting trait expressions for the four best and four poorest soil aggregate forming  
754 fungal strains.  
755

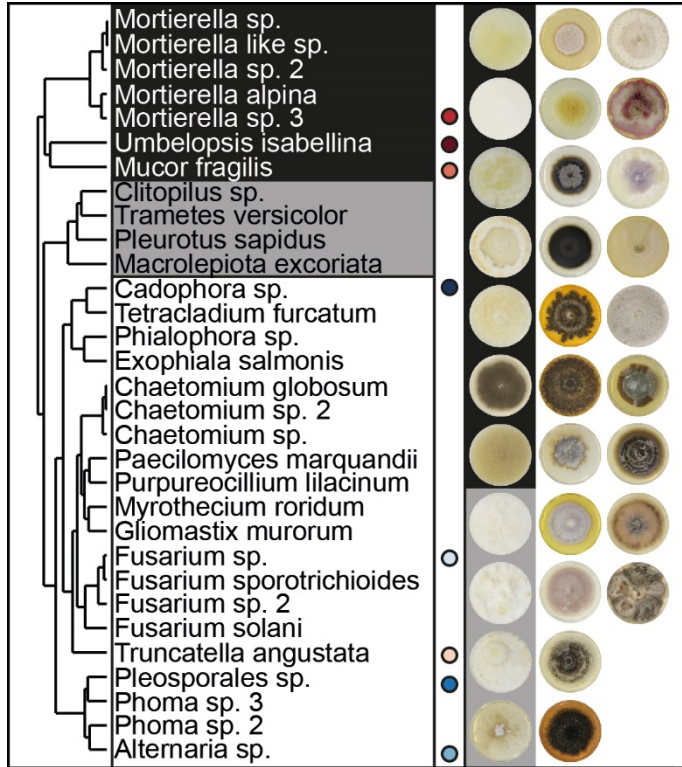

756  
757 Fig. 1.  
758

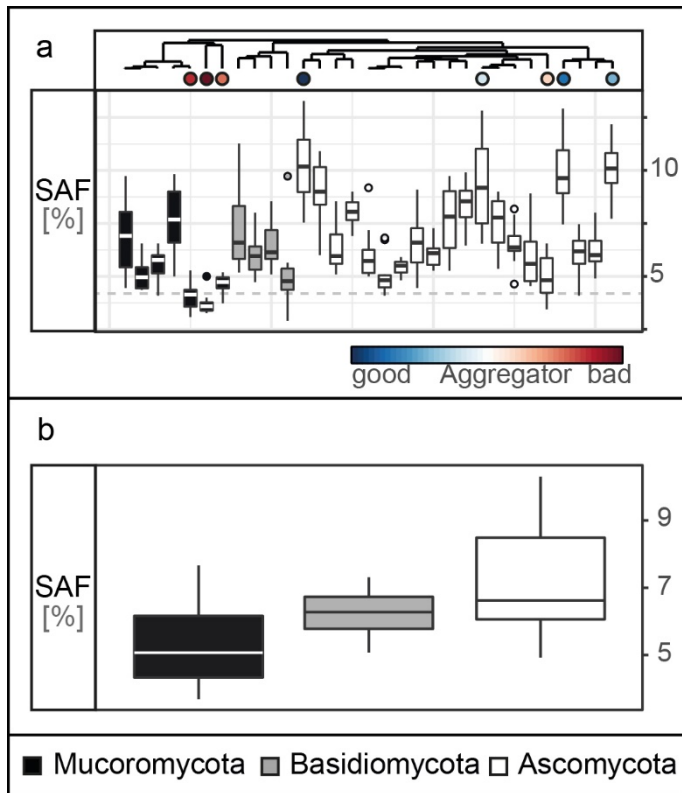

759  
760

Fig. 2.

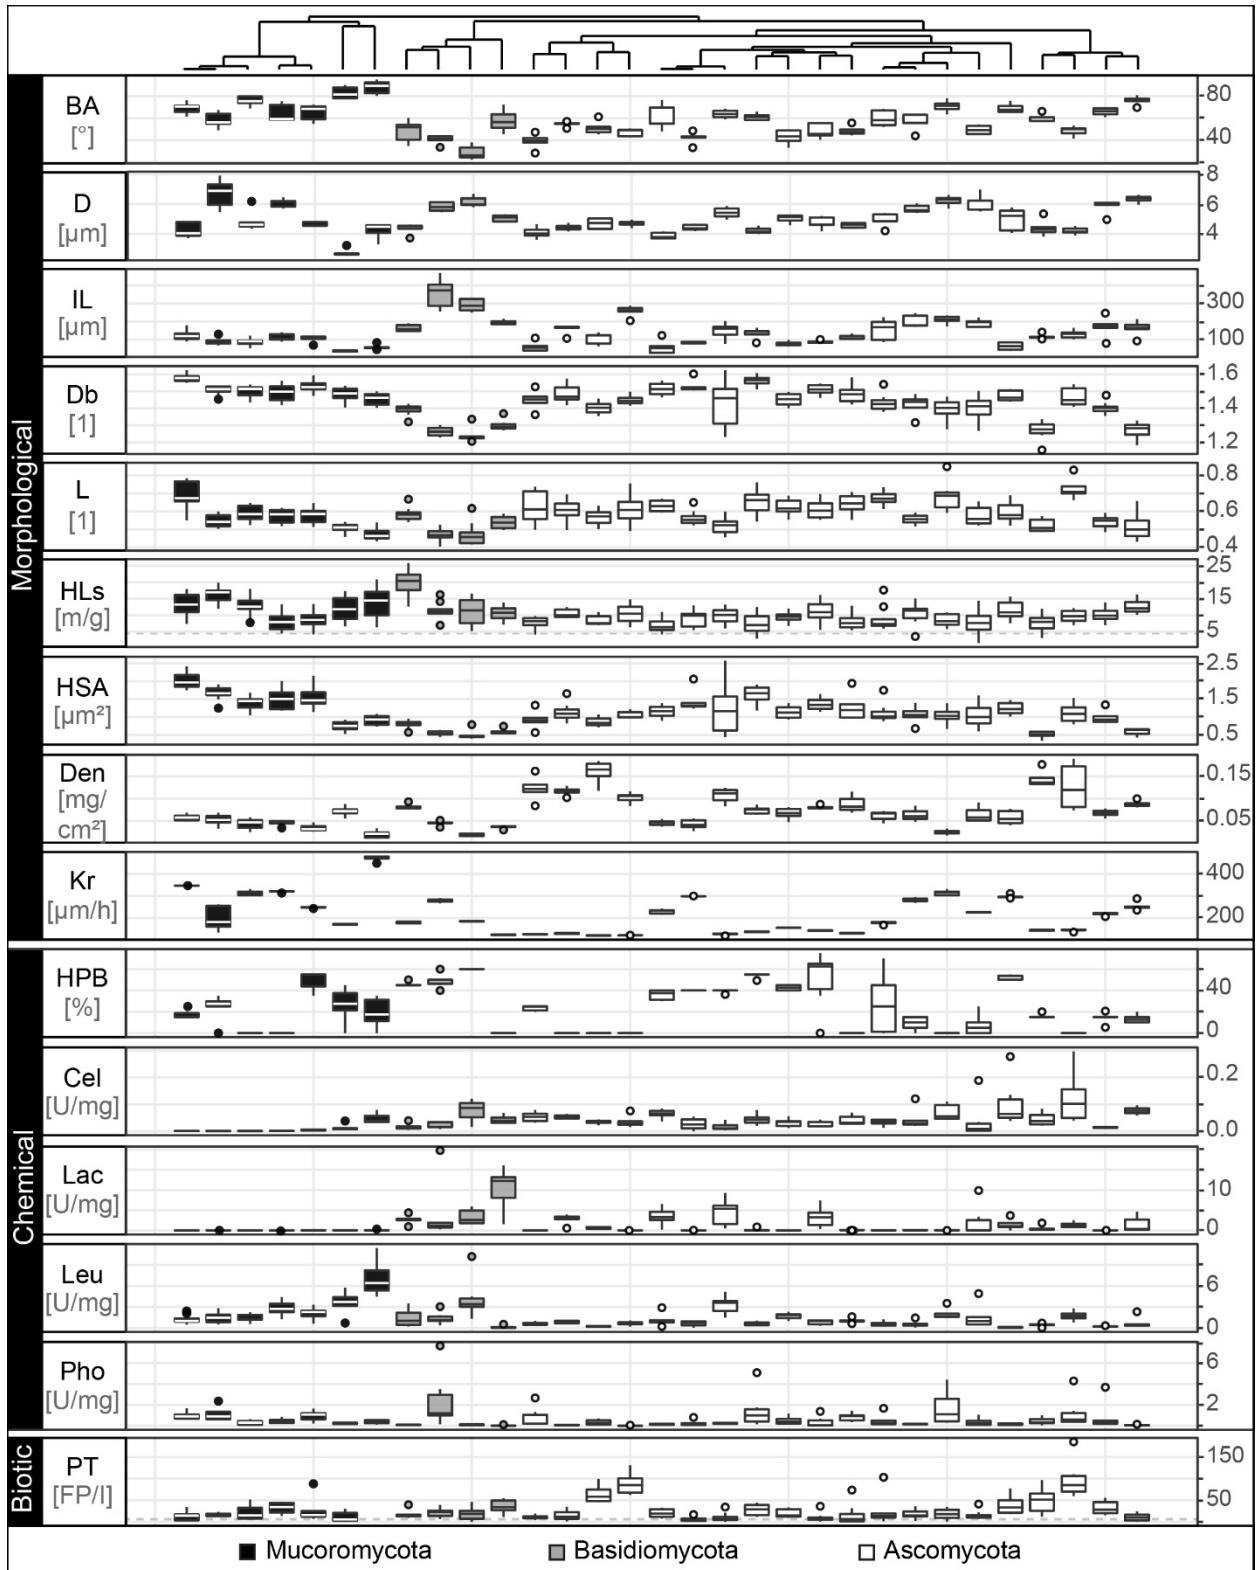

761  
762  
763

Fig. 3.

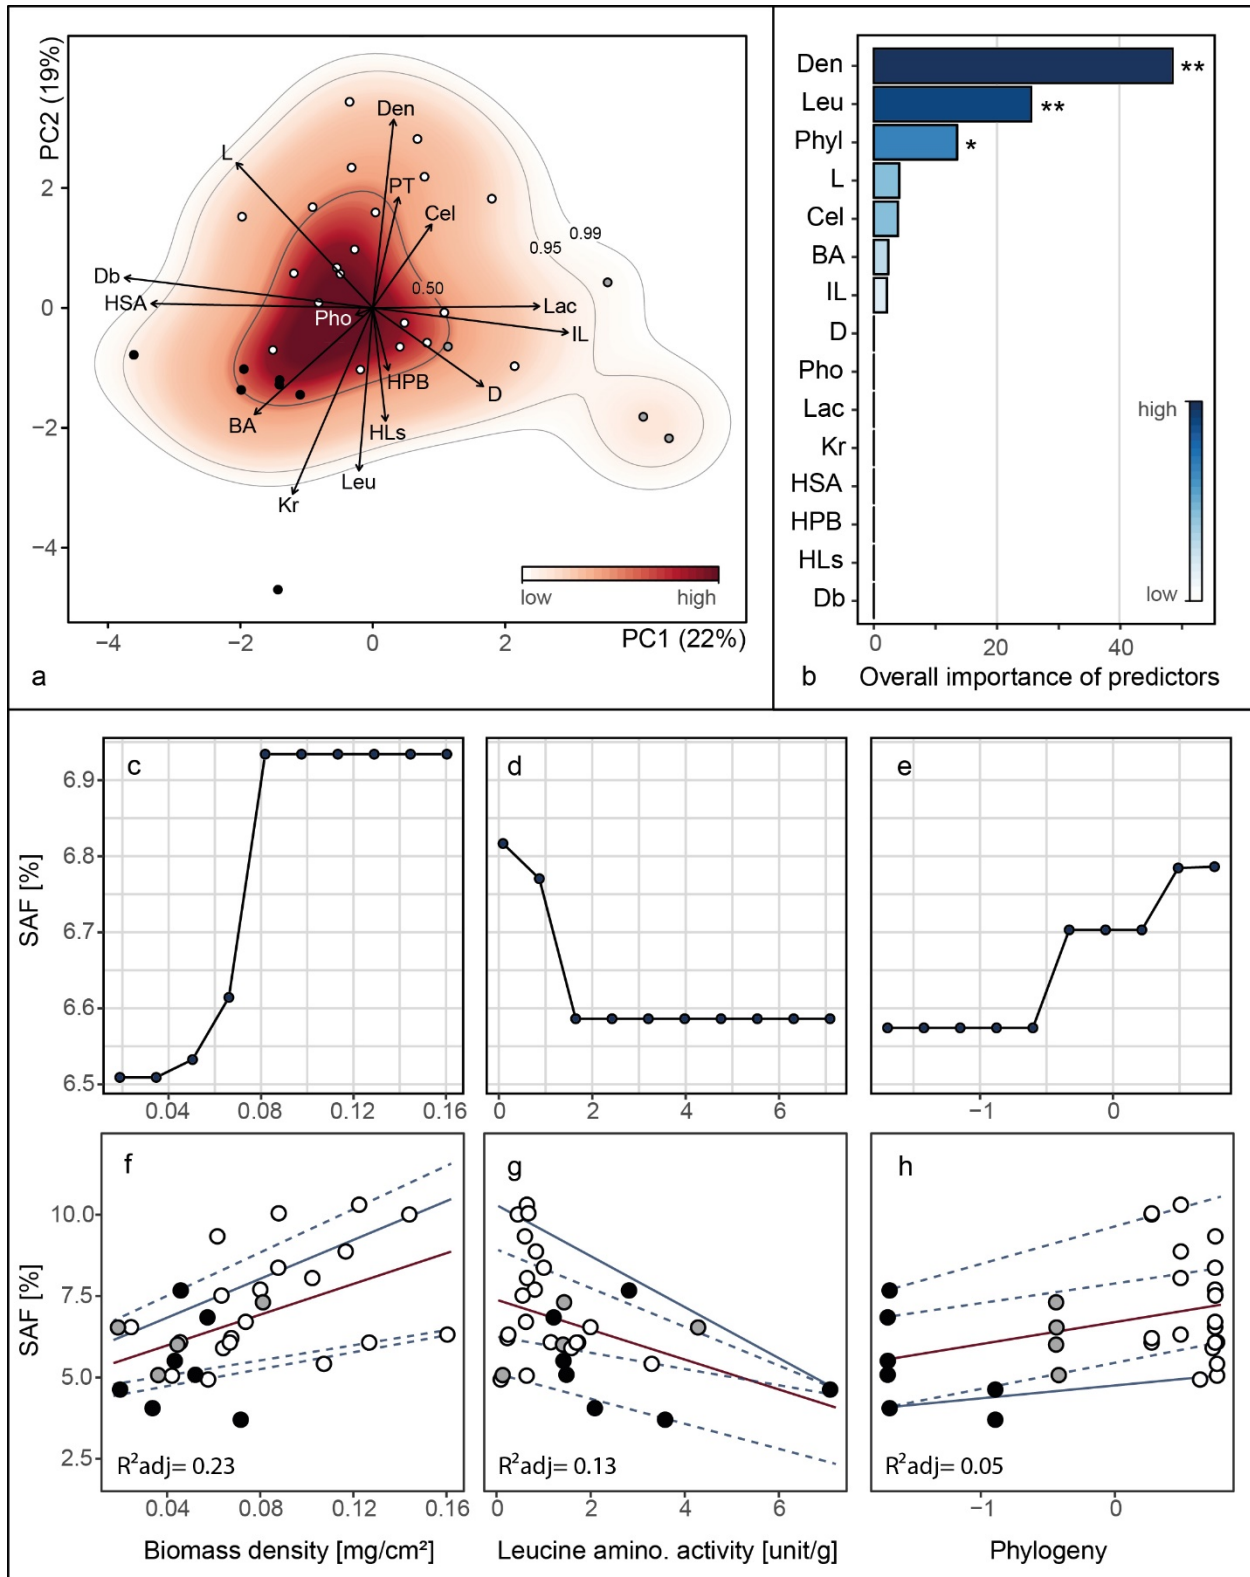

Fig.4.

764  
765  
766

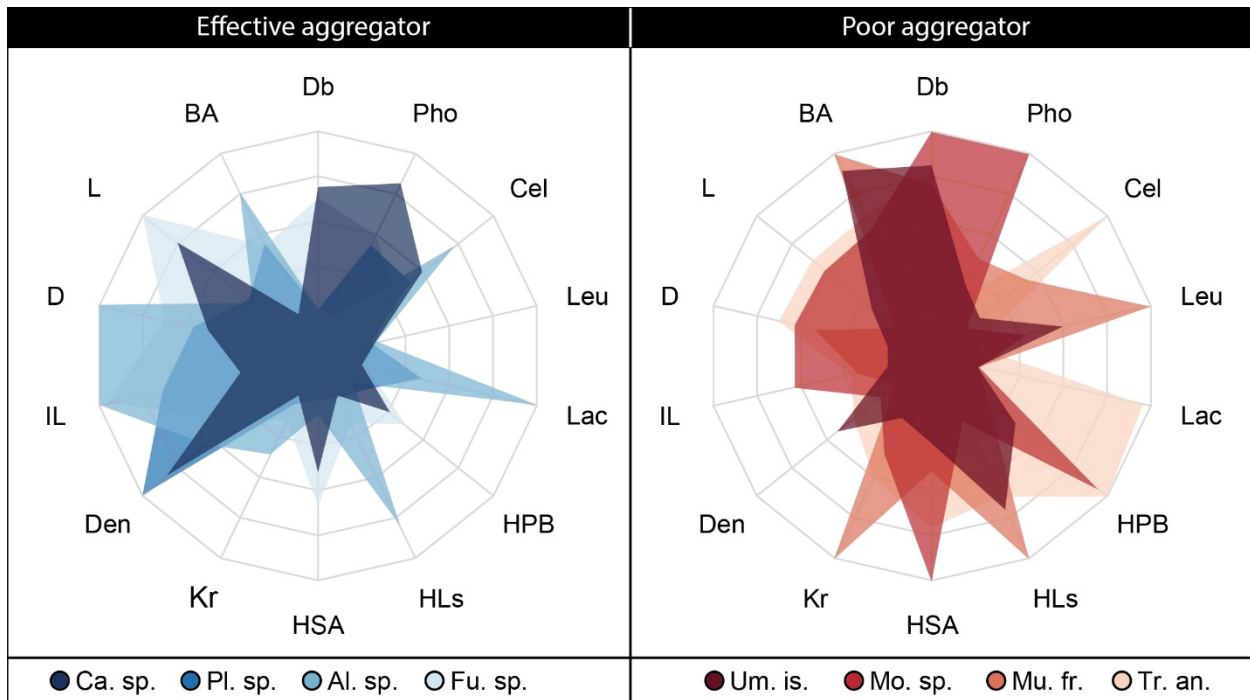

767  
768  
769

Fig.5.
